# Supplementary material for: Selective synthesis of the core–shell structured catalyst χ-Fe5C2 surrounded by nanosized Fe3O4 for the conversion of syngas to liquid fuels
Source: Royal Society of Chemistry journal article supplement (doi:10.1039/d1cy02241e), 2022-01-01
Supplement: d1cy02241e1.pdf [file d1cy02241e1.pdf]

## Supporting Information

### Selective Synthesis of Core-Shell Structured Catalyst $\chi$ -Fe<sub>5</sub>C<sub>2</sub> Surrounded by Nanosized Fe<sub>3</sub>O<sub>4</sub> for Conversion of Syngas to Liquid Fuels

Lei Tang,<sup>a</sup> Bai-Chuan Zhou,<sup>a</sup> Xi Liu,<sup>b</sup> Shuang Xu,<sup>a</sup> Jia Wang,<sup>a</sup> Wei Xu,<sup>a</sup> XiaoHao Liu,<sup>c</sup> Liwei

Chen<sup>b</sup> and An-Hui Lu<sup>\*,a</sup>

<sup>a</sup>State Key Laboratory of Fine Chemicals, Liaoning Key Laboratory for Catalytic Conversion of Carbon Resources, School of Chemical Engineering, Dalian University of Technology, Dalian 116024, P. R. China

<sup>b</sup>School of Chemistry and Chemical, In-situ Center for Physical Science, Shanghai Jiao Tong University, Shanghai 200240, P. R. China

<sup>c</sup>Department of Chemical Engineering, School of Chemical and Material Engineering, Jiangnan University, Wuxi 214122, P. R. China

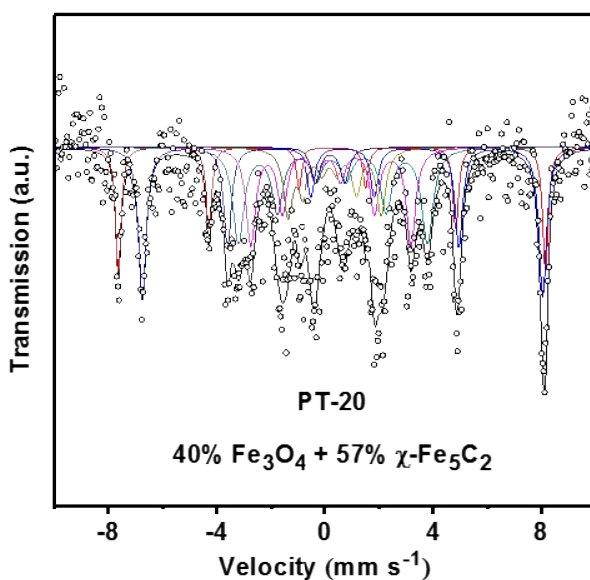

**Figure S1.** Mössbauer spectrum (MES) measured at room temperature of the PT-20 catalyst.

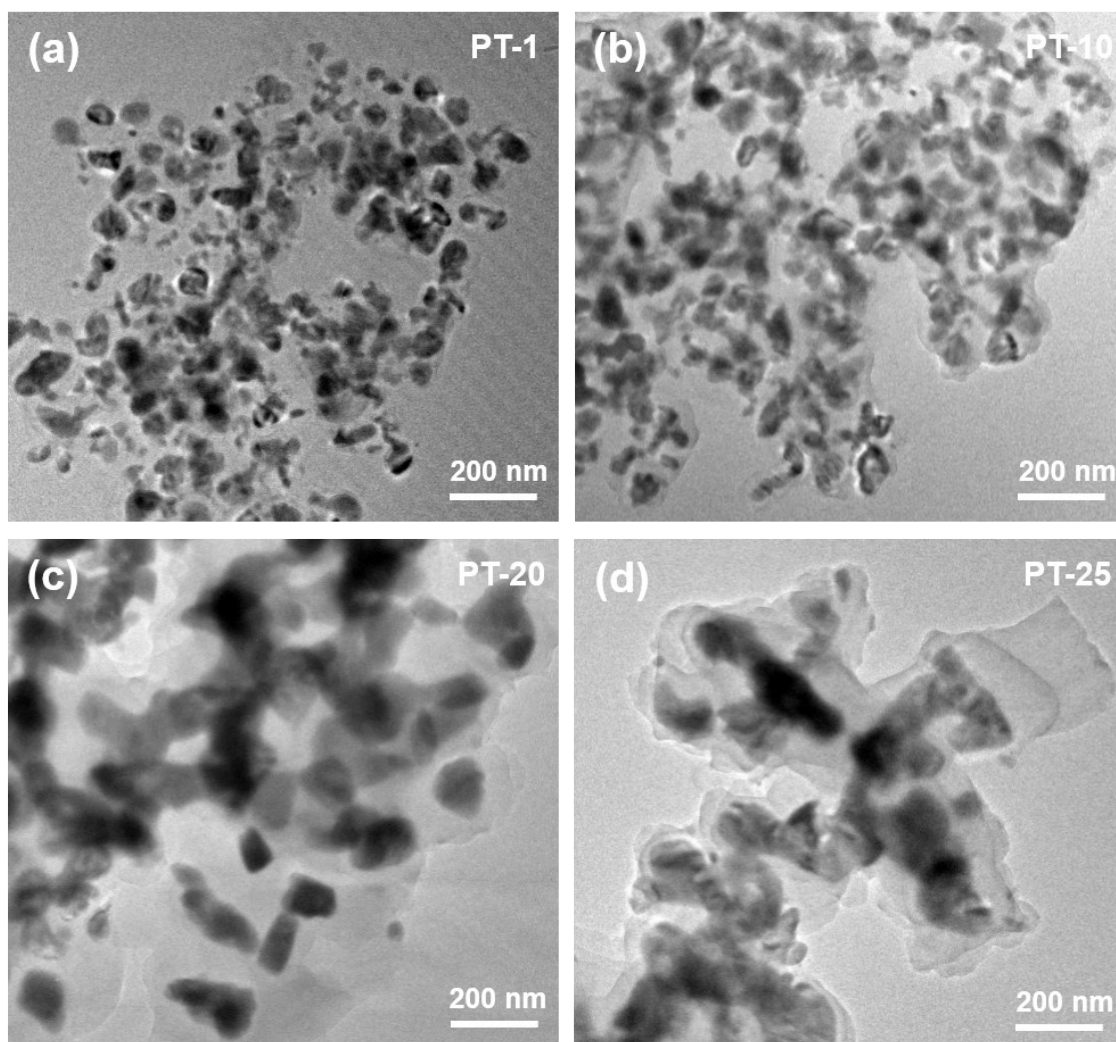

**Figure S2.** TEM images of pretreated (a) PT-1, (b) PT-10, (c) PT-20 and (d) PT-25 catalysts.

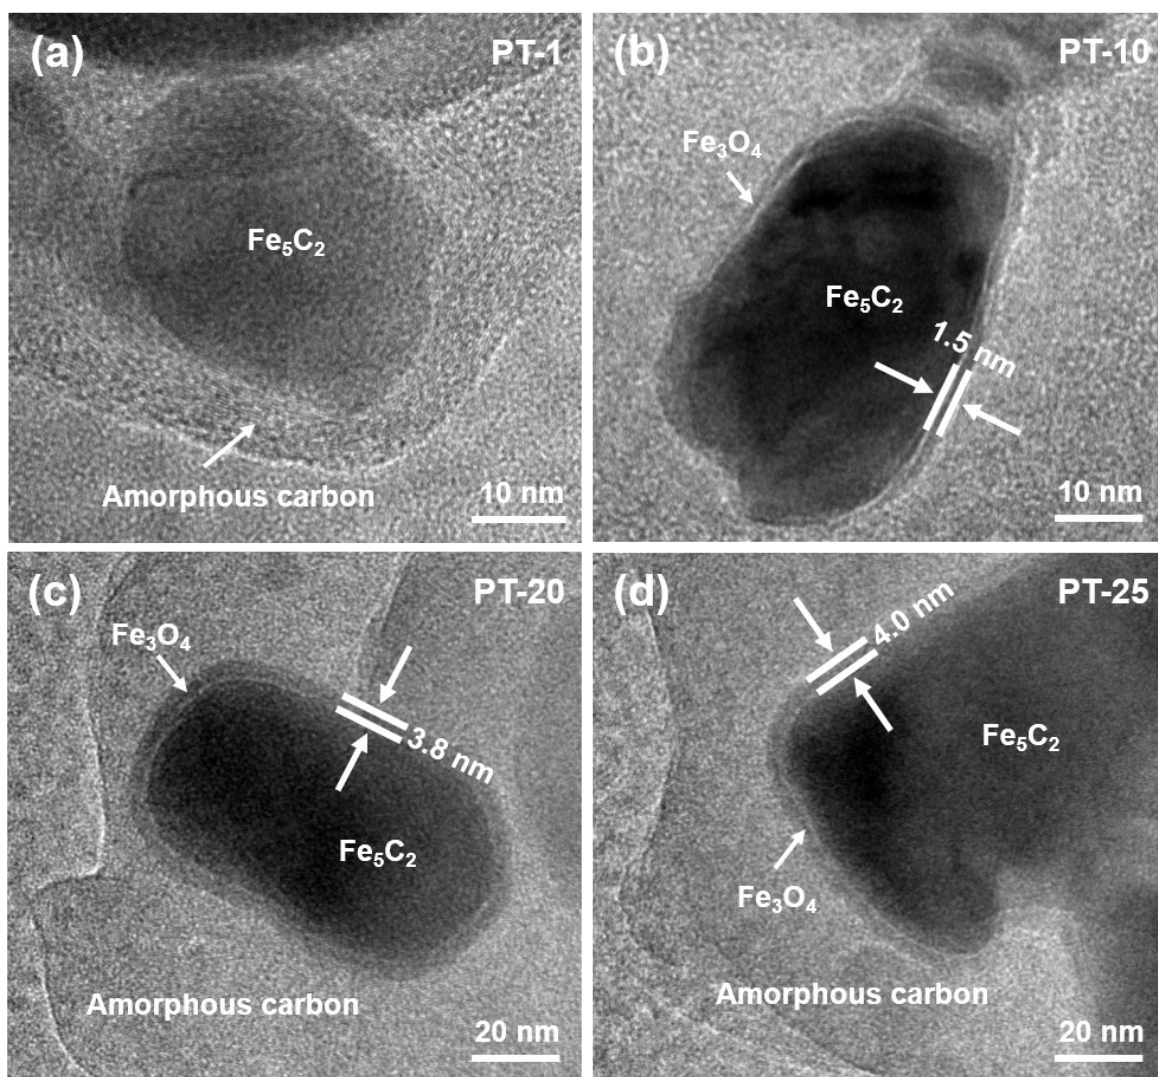

**Figure S3.** TEM images of pretreated (a) PT-1, (b) PT-10, (c) PT-20 and (d) PT-25 catalysts.

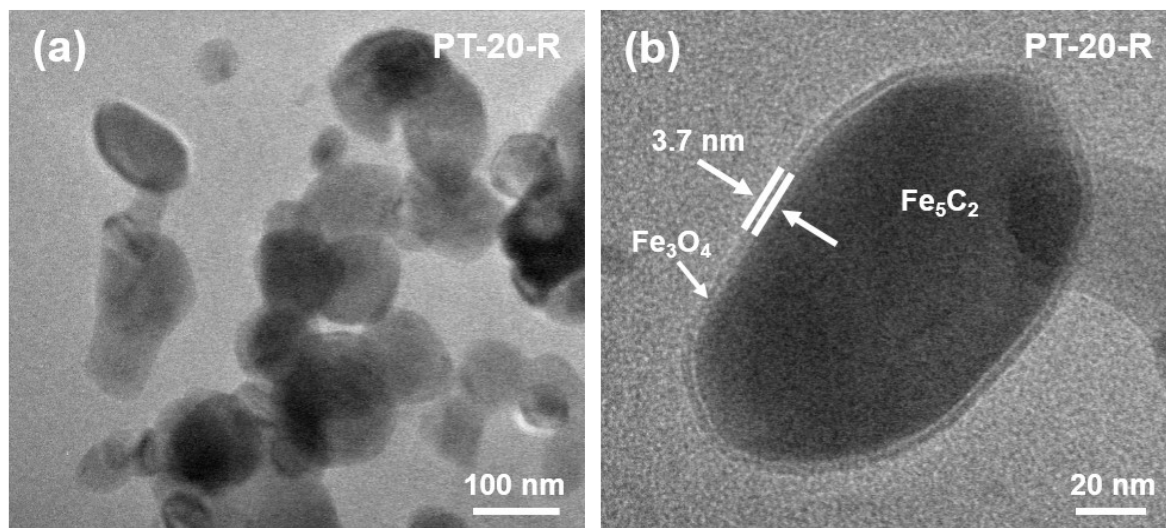

**Figure S4.** TEM images of the PT-20 catalyst after FTS reaction for 40 h.

The XRD patterns (Figure 1b) show that the diffraction peaks of the reacted catalysts retain well after FTS reaction for 40 h. Moreover, the TEM images of the reacted PT-20 catalyst are similar with those of the pretreated PT-20 catalyst, suggesting the catalysts retain stable during FTS reaction. This is also indicated by a stable CO conversion for the PT-20 catalyst is also observed during FTS reaction for 40 h.

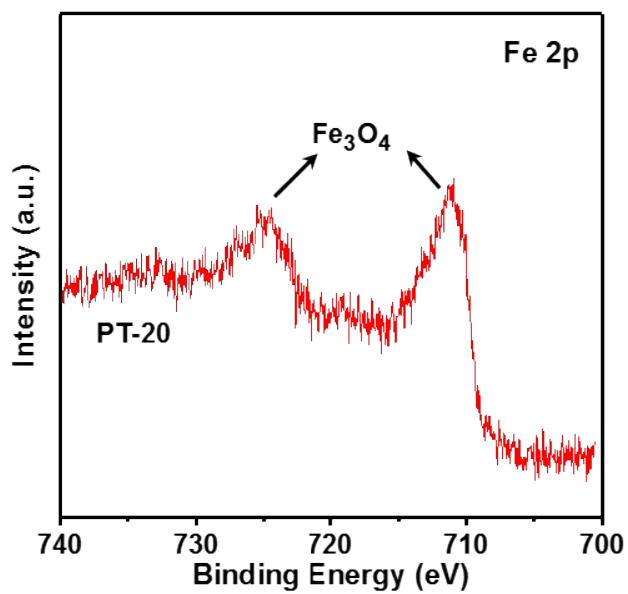

**Figure S5.** Fe 2p XP spectrum of the pretreated PT-20 catalyst.

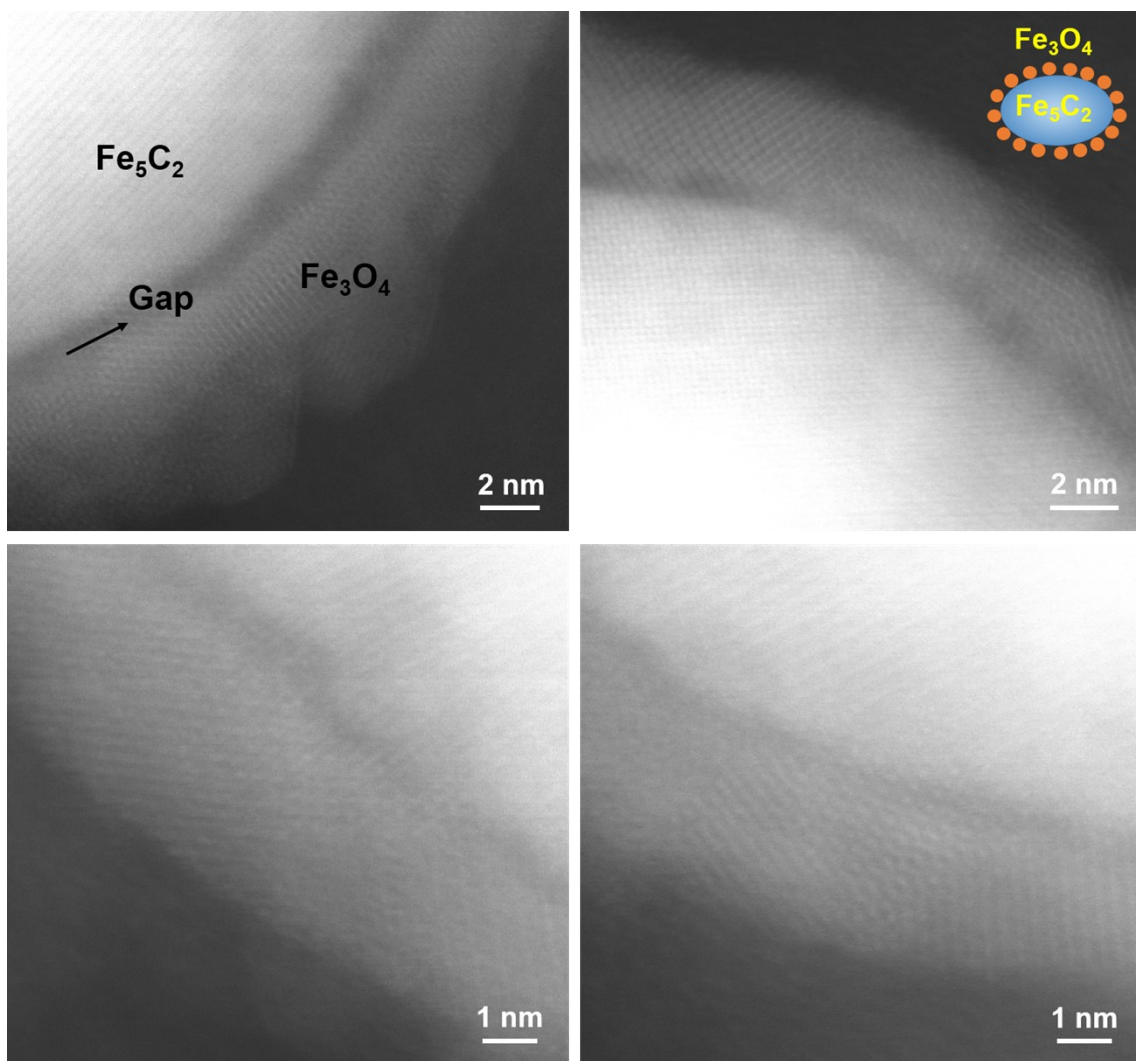

**Figure S6.** STEM-ADF images of typical areas of the pretreated PT-20 catalyst.

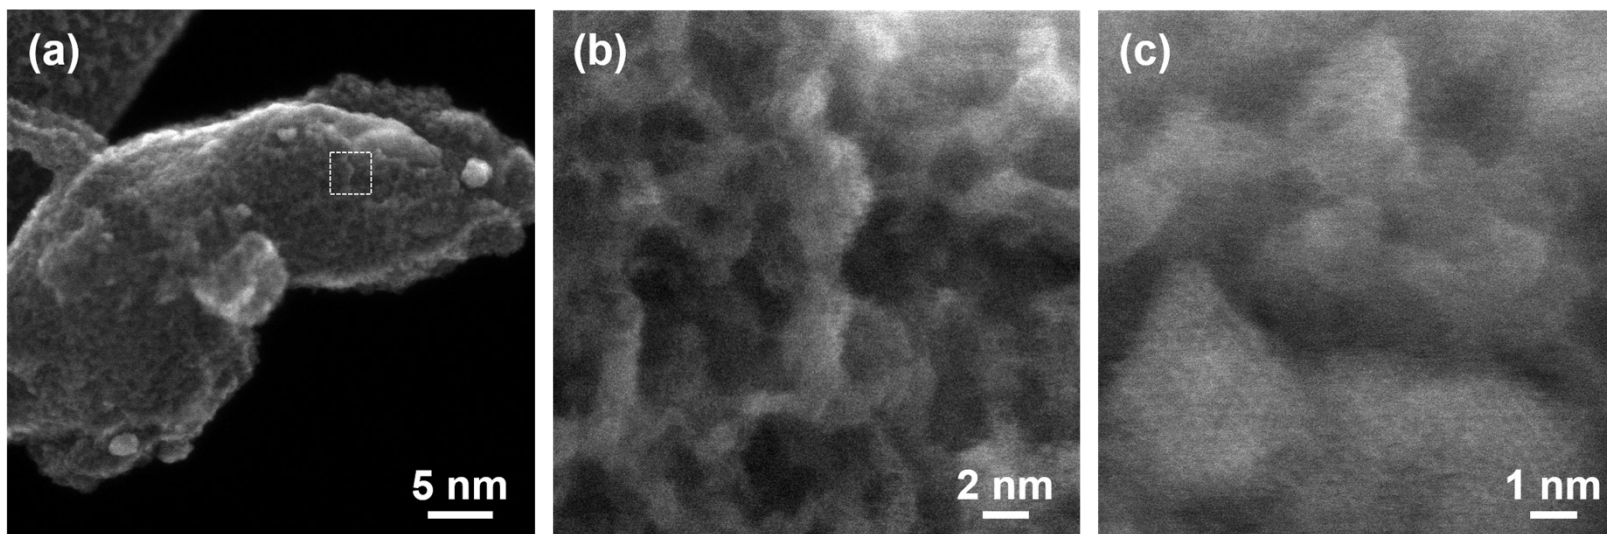

**Figure S7.** (a) STEM-SE images of the pretreated PT-20 catalyst, (b) high-resolution SE image of the region in the white square box in (a), and (c) atomically resolved SE images, showing the stacking structure of the oxide shell.

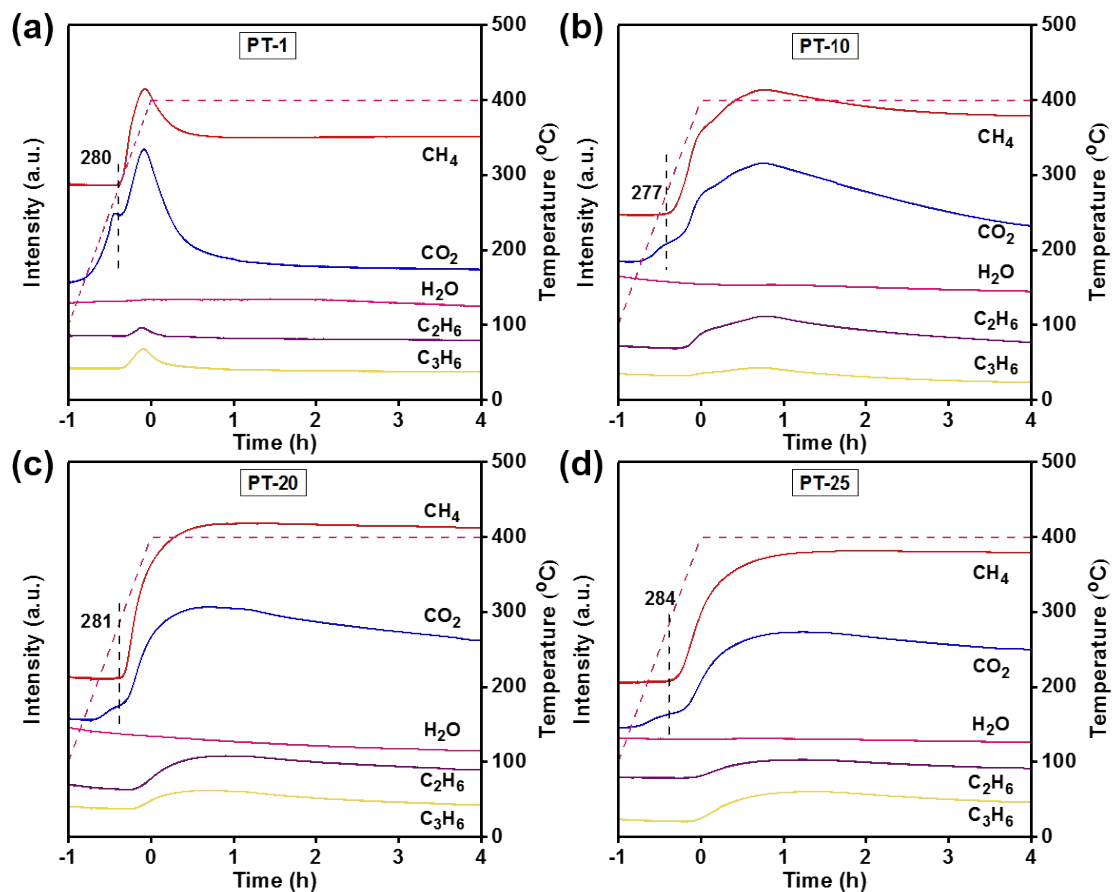

**Figure S8.** Time and temperature dependent TPSR diagrams during pretreatment processes under syngas atmosphere ( $H_2/CO=2$ ) at (a) 1 bar, (b) 10 bar, (c) 20 bar and (d) 25 bar by *on-line* MS. Note that the time was counted 0 when the temperature reached 400 °C.



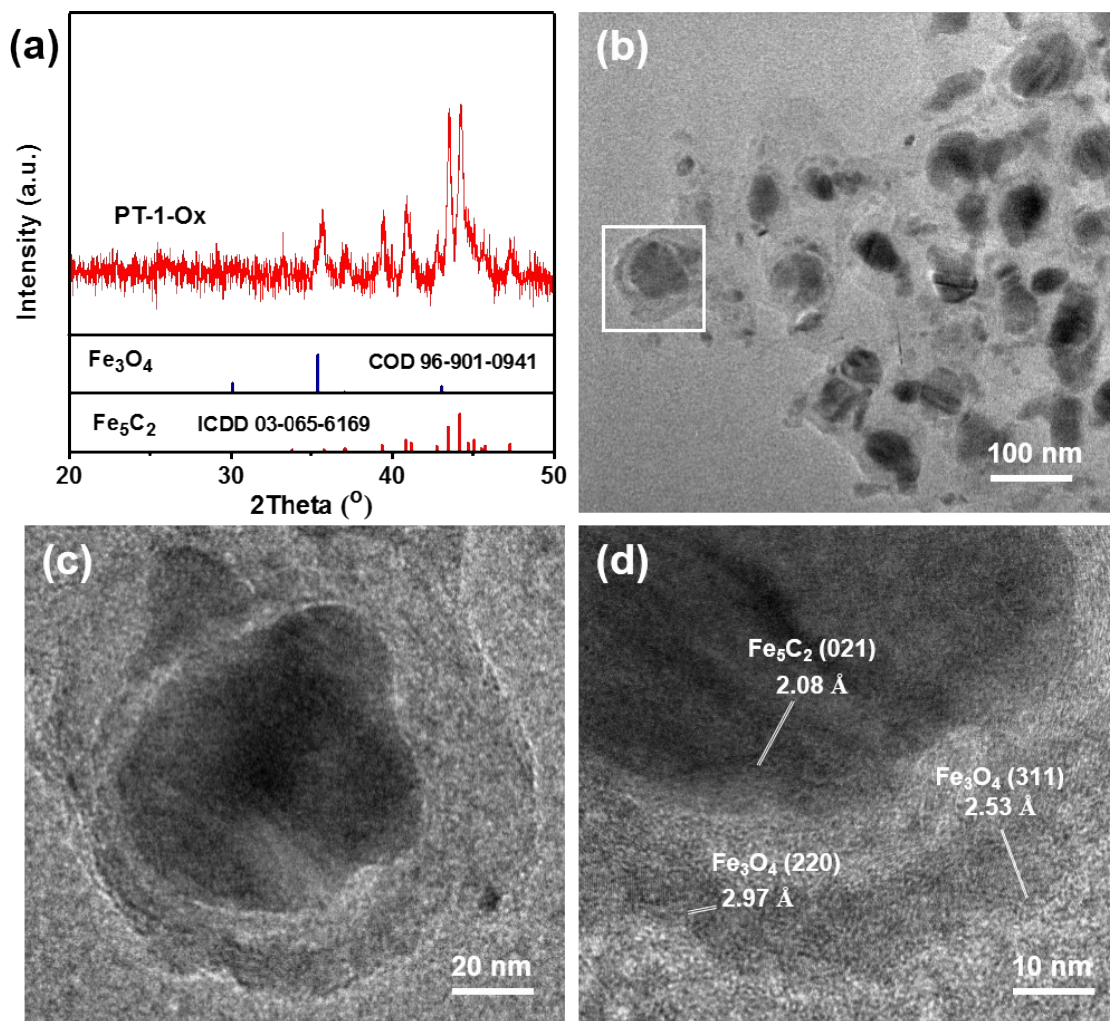

**Figure S9.** (a) XRD pattern and (b, c, d) TEM images of the PT-1-Ox catalyst. Note that the PT-1-Ox catalyst was obtained by oxidizing the PT-1 catalyst in 21% $\text{O}_2/\text{N}_2$  at 250  $^\circ\text{C}$  for 1 h.

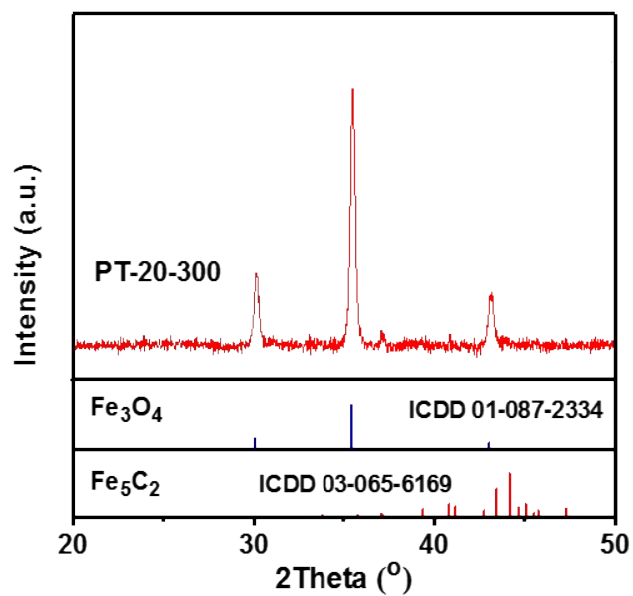

**Figure S10.** XRD pattern of the PT-20-300 catalyst. Note that the PT-20-300 catalyst was obtained by pretreating the Fe<sub>3</sub>O<sub>4</sub> precursor in syngas (H<sub>2</sub>/CO=2) at 300 °C and 20 bar for 4 h.

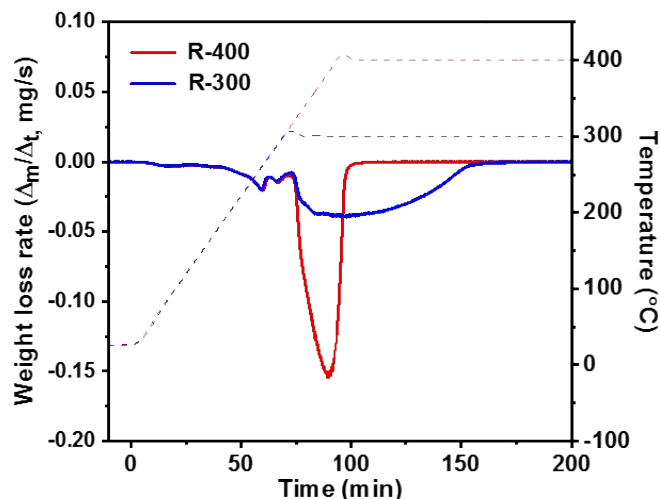

**Figure S11.** Weight loss rate of  $\text{Fe}_3\text{O}_4$  as a function of time under  $\text{H}_2$  atmosphere. Note that R-400 was heated at a rate of  $5\text{ }^\circ\text{C min}^{-1}$  to  $400\text{ }^\circ\text{C}$  by pretreating the  $\text{Fe}_3\text{O}_4$  precursor in high-purity  $\text{H}_2$  atmosphere. R-300 was heated to  $300\text{ }^\circ\text{C}$  in the same way.

To investigate the oxygen removal ability under different temperature-programmed processes, the reduction experiments were conducted especially in  $\text{H}_2$  atmosphere for excluding the interference of carbon diffusion and carbon deposition reactions in syngas atmosphere. The weight loss rate ( $\Delta_m/\Delta_t$ ) that represents the hydrogenation removal rate of lattice oxygen of  $\text{Fe}_3\text{O}_4$ , was obtained on an intelligent gravimetric analyzer (IGA-100, Hiden Analytical). As shown in Figure S11, when temperature rises further above  $300\text{ }^\circ\text{C}$ , the weight loss rate is much higher than that at a constant temperature of  $300\text{ }^\circ\text{C}$  (R-300). A sharp peak of weight loss rate indicates a faster lattice oxygen removal kinetics under higher temperature.

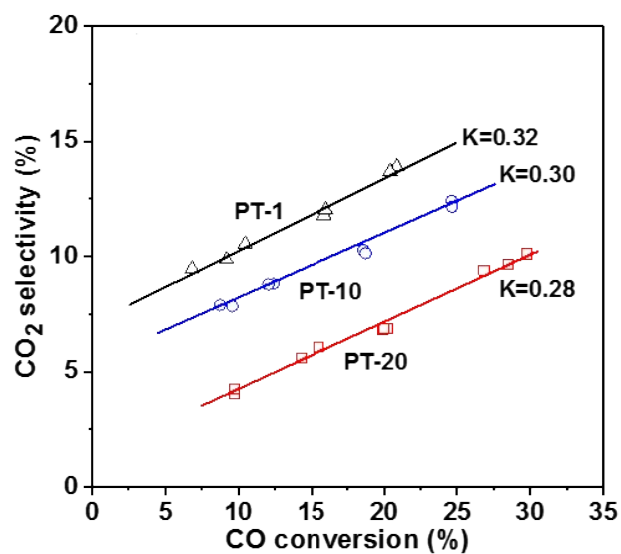

**Figure S12.** CO<sub>2</sub> selectivity as a functional of CO conversion. The CO conversion was varied by adjusting the flow rate of syngas in the range of 10~100 ml min<sup>-1</sup>.

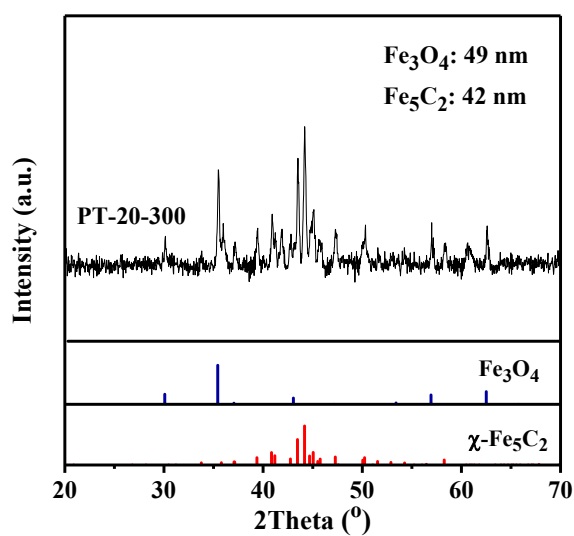

**Figure S13.** XRD pattern of the PT-20 catalyst after reaction at 300 °C. Reaction condition: syngas (H<sub>2</sub>/CO=2), 20 bar and 300 °C.

**Table S1. Mössbauer fitted parameters of the pretreated PT-20 catalyst.**

| Catalysts | IS (mm s <sup>-1</sup> ) | QS (mm s <sup>-1</sup> ) | Hyperfine Field (T) | $\Gamma$ (mm s <sup>-1</sup> ) | Phases                                       | Compositions (%) |
|-----------|--------------------------|--------------------------|---------------------|--------------------------------|----------------------------------------------|------------------|
| PT-20     | 0.17                     | 0.09                     | 18.5                | 0.41                           | $\chi$ -Fe <sub>5</sub> C <sub>2</sub> (I)   | 19.8             |
|           | 0.26                     | 0.04                     | 21.8                | 0.50                           | $\chi$ -Fe <sub>5</sub> C <sub>2</sub> (II)  | 23.5             |
|           | 0.26                     | 0.18                     | 10.8                | 0.41                           | $\chi$ -Fe <sub>5</sub> C <sub>2</sub> (III) | 13.3             |
|           | 0.26                     | -0.02                    | 49.0                | 0.24                           | Fe <sub>3</sub> O <sub>4</sub> (A)           | 15.0             |
|           | 0.65                     | -0.02                    | 46.0                | 0.34                           | Fe <sub>3</sub> O <sub>4</sub> (B)           | 25.0             |
|           | 0.20                     | 1.08                     | -                   | 0.39                           | spm Fe <sup>3+</sup>                         | 3.4              |

**Table S2.** Performance of representative Fe-based FTS catalysts over the reaction temperature range of 230~270 °C in literature.

| Sample                                          | Conditions |         |                    | CO Conv. [%] | Products Sel. [%] <sup>a</sup> |                 |                                   |                 | Ref       |
|-------------------------------------------------|------------|---------|--------------------|--------------|--------------------------------|-----------------|-----------------------------------|-----------------|-----------|
|                                                 | T [°C]     | P [bar] | H <sub>2</sub> /CO |              | CO <sub>2</sub>                | CH <sub>4</sub> | C <sub>2</sub> =-C <sub>4</sub> = | C <sub>5+</sub> |           |
| PT-20                                           | 230        | 20      | 2                  | 19           | 7                              | 10              | 21                                | 45              | This work |
| Fe/ $\alpha$ -Al <sub>2</sub> O <sub>3</sub> -H | 250        | 1       | 1                  | 2            | 43                             | 22              | 31                                | 1               | 1         |
| Fe <sub>2</sub> O <sub>3</sub> -CO              | 270        | 13      | 0.7                | 86           | 46                             | 6               | N.G.                              | 33 <sup>b</sup> | 2         |
| FeCu/SiO <sub>2</sub>                           | 250        | 15      | 0.67               | 29           | 30                             | 7 <sup>b</sup>  | 9 <sup>b</sup>                    | 34 <sup>b</sup> | 3         |
| FeCuNa/SiO <sub>2</sub>                         | 250        | 15      | 0.67               | 64           | 45                             | 4 <sup>b</sup>  | 13 <sup>b</sup>                   | 35 <sup>b</sup> | 3         |
| FeSi                                            | 250        | 15      | 0.67               | 53           | 34                             | 17 <sup>b</sup> | 23 <sup>b</sup>                   | 17 <sup>b</sup> | 4         |
| FeKSi                                           | 260        | 15      | 2                  | 57           | 46                             | 7 <sup>b</sup>  | 10 <sup>b</sup>                   | 31 <sup>b</sup> | 4         |
| Fe-in-CNT                                       | 270        | 51      | 2                  | 40           | 18                             | 10              | N.G.                              | 24              | 5         |
| Fe/NCNTs                                        | 270        | 20      | 1                  | 45           | 21                             | 11              | 4                                 | 60              | 6         |
| $\chi$ -Fe <sub>3</sub> C <sub>2</sub>          | 270        | 30      | 2                  | 24           | 10                             | 14              | 17                                | 35              | 7         |
| in-Fe/CNT                                       | 270        | 20      | 2                  | 86           | 39 <sup>b</sup>                | 16 <sup>b</sup> | N.G.                              | 22 <sup>b</sup> | 8         |
| $\epsilon$ -Fe <sub>2</sub> C                   | 235        | 23      | 1.5                | 15           | 5                              | 16              | N.G.                              | 46              | 9         |

<sup>a</sup>Products selectivity (mol percentage) was normalized including CO<sub>2</sub>. <sup>b</sup>Products distribution (mass percentage, wt%) was normalized including CO<sub>2</sub>. N.G.: Not Given.

**Table S3.** The representative catalytic performance of PT-*x* catalysts.<sup>a</sup>

| Sample | Temperature<br>[°C] | Gas flow<br>[ml min <sup>-1</sup> ] | CO Conv.<br>[%] | Product sel.[%] |                                |                  |                 |
|--------|---------------------|-------------------------------------|-----------------|-----------------|--------------------------------|------------------|-----------------|
|        |                     |                                     |                 | CH <sub>4</sub> | C <sub>2</sub> -C <sub>4</sub> | C <sub>5</sub> + | CO <sub>2</sub> |
| PT-1   | 250                 | 20                                  | 94              | 12              | 29                             | 28               | 31              |
| PT-1   | 250                 | 50                                  | 64              | 11              | 38                             | 27               | 24              |
| PT-20  | 250                 | 20                                  | 50              | 8               | 35                             | 43               | 14              |
| PT-1   | 300                 | 20                                  | 97              | 17              | 27                             | 24               | 32              |
| PT-20  | 300                 | 20                                  | 96              | 11              | 34                             | 26               | 29              |

<sup>a</sup>Reaction conditions: syngas (H<sub>2</sub>/CO=2), 20 bar.

## REFERENCES

- (1) Zhou, X. P.; Ji, J.; Wang, D.; Duan, X. Z.; Qian, G.; Chen, D.; Zhou, X. G. *Chem. Commun.* 2015, **51**, 8853-8856.
- (2) Luo, M. S.; Hamdeh, H.; Davis, B. H. *Catal. Today* 2009, **140**, 127-134.
- (3) An, X.; Wu, B. S.; Wan, H. J.; Li, T. Z.; Tao, Z. C.; Xiang, H. W.; Li, Y. W. *Catal. Commun.* 2007, **8**, 1957-1962.
- (4) Li, J. F.; Cheng, X. F.; Zhang, C. H.; Chang, Q.; Wang, J.; Wang, X. P.; Lv, Z. G.; Dong, W. S.; Yang, Y.; Li Y. W. *Appl. Catal. A-Gen.* 2016, **528**, 131-141.
- (5) Chen, W.; Fan, Z. L.; Pan, X. L.; Bao, X. H. *J. Am. Chem. Soc.* 2008, **130**, 9414-9419.
- (6) Li, Z. H.; Liu, R. J.; Xu, Y.; Ma, X. B. *Appl. Surf. Sci.* 2015, **347**, 643-650.
- (7) Yang, C.; Zhao, H.; Hou, Y. L.; Ma, D. *J. Am. Chem. Soc.* 2012, **134**, 15814-15821.
- (8) Abbaslou, R. M. M.; Tavassoli, A.; Soltan, J.; Dalai, A. K. *Appl. Catal. A-Gen.* 2009, **367**, 47-52.
- (9) Wang, P.; Chen, W.; Chiang, F. K.; Dugulan, A. I.; Song, Y. J.; Pestman, R.; Zhang, K.; Yao, J. S.; Feng, B.; Miao, P.; Xu, W.; E Hensen, J. M. *Sci. Adv.* 2018, **4**, eaau2947.
